# Supplementary material for: Dual-colored 4,4′,4′′,4′′′-(cyclobutane-1,2,3,4-tetrayl)-tetrabenzoate electrochromic materials with large optical contrast and coloration efficiency
Source: Royal Society of Chemistry journal article supplement (doi:10.1039/c9nj03352a), 2019-01-01
Supplement: c9nj03352a1.pdf [file c9nj03352a1.pdf]

**Dual-colored 4,4',4'',4'''-(cyclobutane-1,2,3,4-tetrayl)-  
tetrabenzoate electrochromic materials with large optical  
contrast and coloration efficiency**

Chun-rong Zhu, Jia-ping Xie, Hong-rong Mou, Zhen-jie Huang, Qian-Tang,\* Cheng-Bin Gong,\* Xiang-Kai Fu

The Key Laboratory of Applied Chemistry of Chongqing Municipality, Chongqing Key Laboratory of Soft-Matter Material Chemistry and Function Manufacturing, College of Chemistry and Chemical Engineering, Southwest University, Chongqing, 400715, China.

|                                                |        |
|------------------------------------------------|--------|
| S1 Solubility behavior of CBTBAs.....          | S2     |
| S2 NMR and mass spectra .....                  | S2-S6  |
| S3 ECD construction .....                      | S7     |
| S4 Crystal data and structure refinement ..... | S8     |
| S5 Molecular orbital diagrams of CBTBAs.....   | S9-S10 |
| S6 Cyclic voltammogram.....                    | S11    |
| S7 UV-Vis Spectroscopy.....                    | S12    |
| S8 Transmittance change.....                   | S13    |
| S9 Response time.....                          | S14    |
| S10 Coloration efficiency.....                 | S15    |

## S1 Solubility behavior of CBTBAs

**Table S1** Solubility behavior of CBTBAs

| Compound | Chloroform | CH <sub>2</sub> Cl <sub>2</sub> | NMP | DMF | THF | Ethyl acetate | Butyl acetate | Toluene |
|----------|------------|---------------------------------|-----|-----|-----|---------------|---------------|---------|
| <b>a</b> | ++         | ++                              | ++  | ++  | ++  | ++            | ++            | —       |
| <b>b</b> | ++         | ++                              | ++  | ++  | ++  | ++            | ++            | —       |
| <b>c</b> | ++         | ++                              | ++  | ++  | ++  | ++            | ++            | —       |
| <b>d</b> | ++         | ++                              | ++  | ++  | ++  | ++            | ++            | —       |
| <b>e</b> | ++         | ++                              | ++  | ++  | ++  | —             | —             | —       |
| <b>f</b> | ++         | ++                              | ++  | ++  | ++  | —             | —             | —       |
| <b>g</b> | ++         | ++                              | ++  | ++  | ++  | —             | —             | —       |
| <b>h</b> | ++         | ++                              | ++  | ++  | ++  | +—            | +—            | —       |
| <b>i</b> | +—         | +—                              | ++  | ++  | ++  | —             | —             | —       |

The solubility was determined with a 50 mg sample in 1 mL solvent. ++ denotes soluble at room temperature; +— denotes partially soluble or swelling; — denotes insoluble even on heating.

## S2 NMR and mass spectra

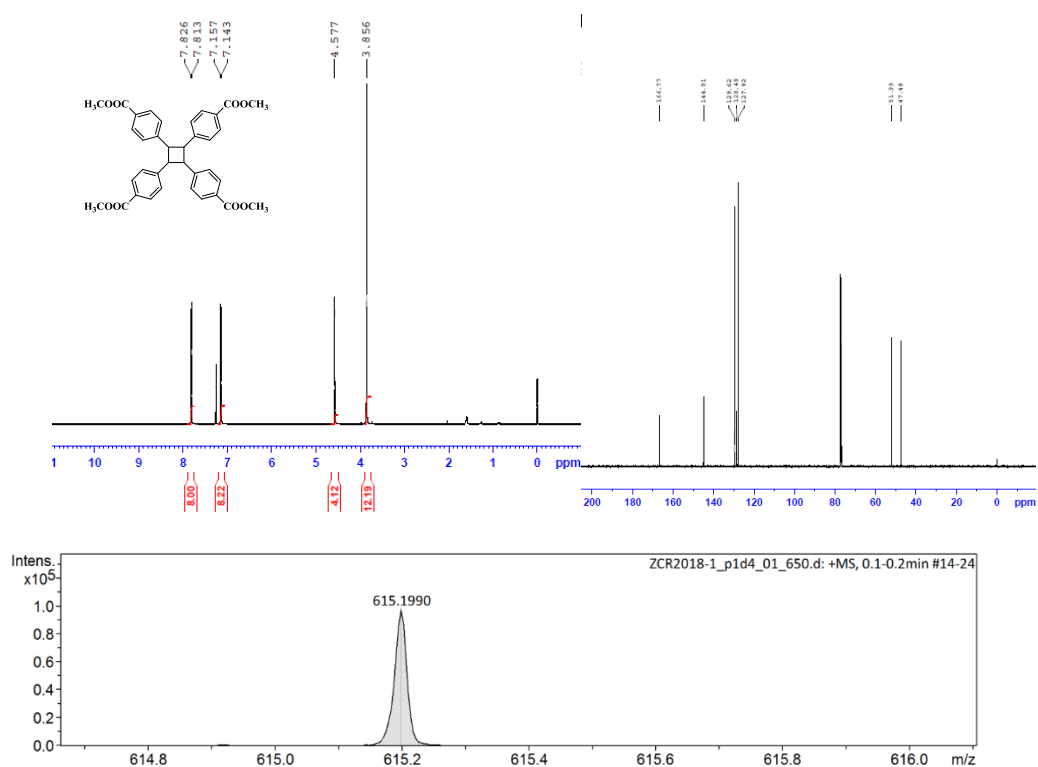

**Fig. S1** <sup>1</sup>H NMR (top, left), <sup>13</sup>C NMR (top, right), and mass spectra (bottom) of compound **a**.

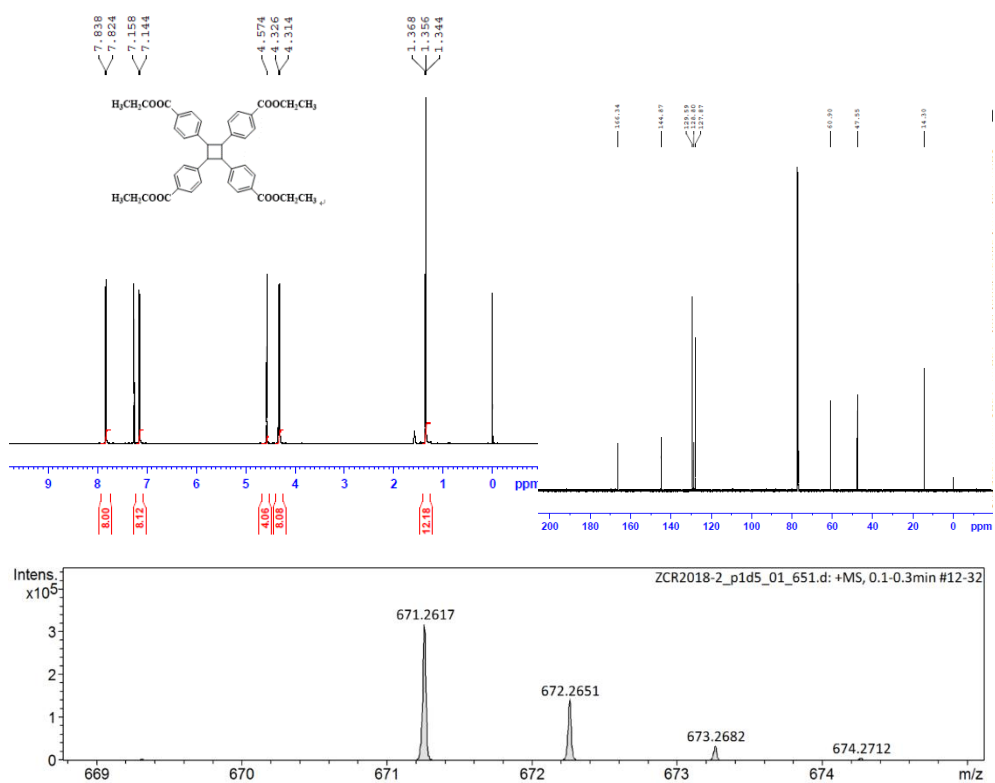

**Fig. S2** <sup>1</sup>H NMR (top, left), <sup>13</sup>C NMR (top, right), and mass spectra (bottom) of compound **b**.

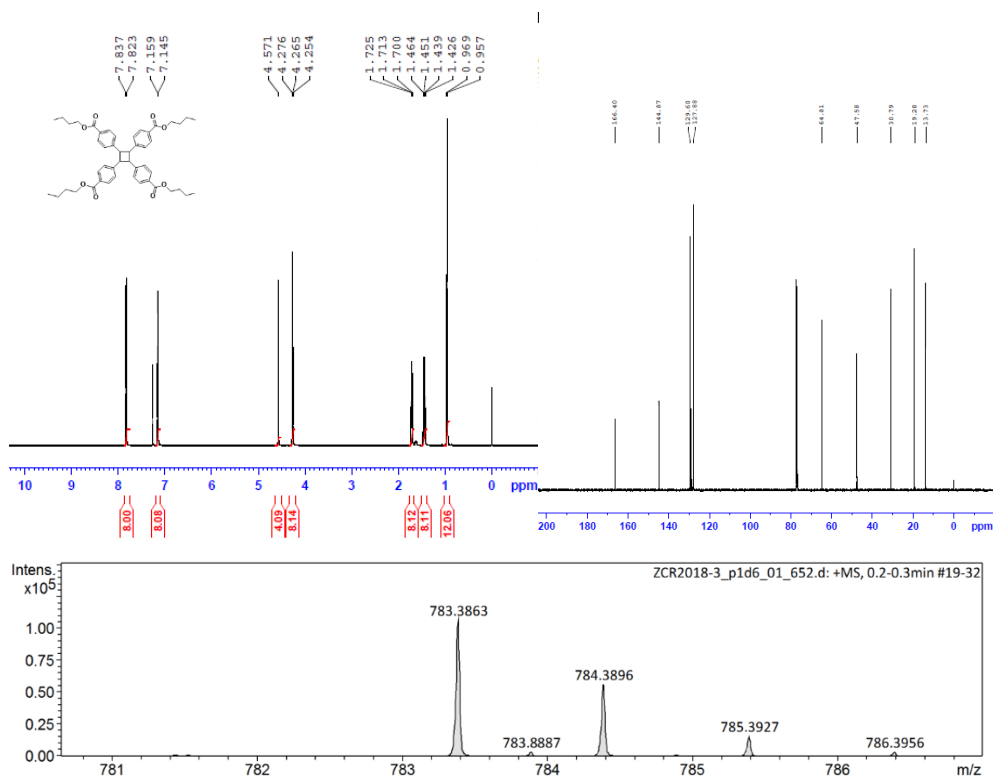

**Fig. S3** <sup>1</sup>H NMR (top, left), <sup>13</sup>C NMR (top, right), and mass spectra (bottom) of compound **c**.

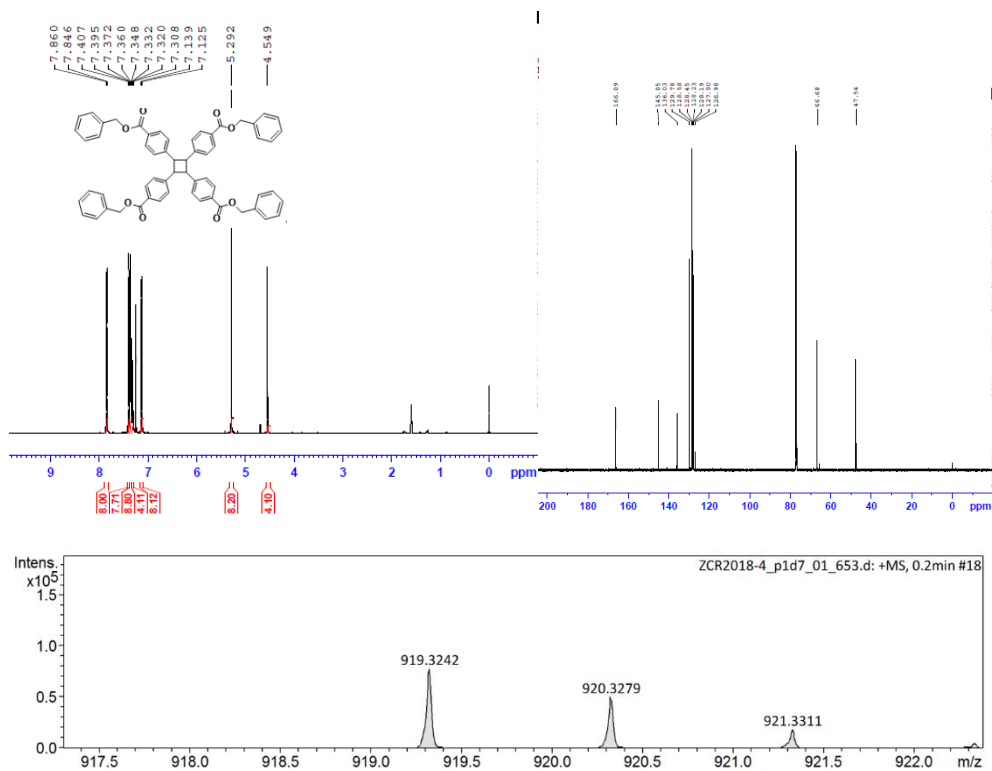

**Fig. S4**  $^1\text{H}$  NMR (top, left),  $^{13}\text{C}$  NMR (top, right), and mass spectra (bottom) of compound **d**.

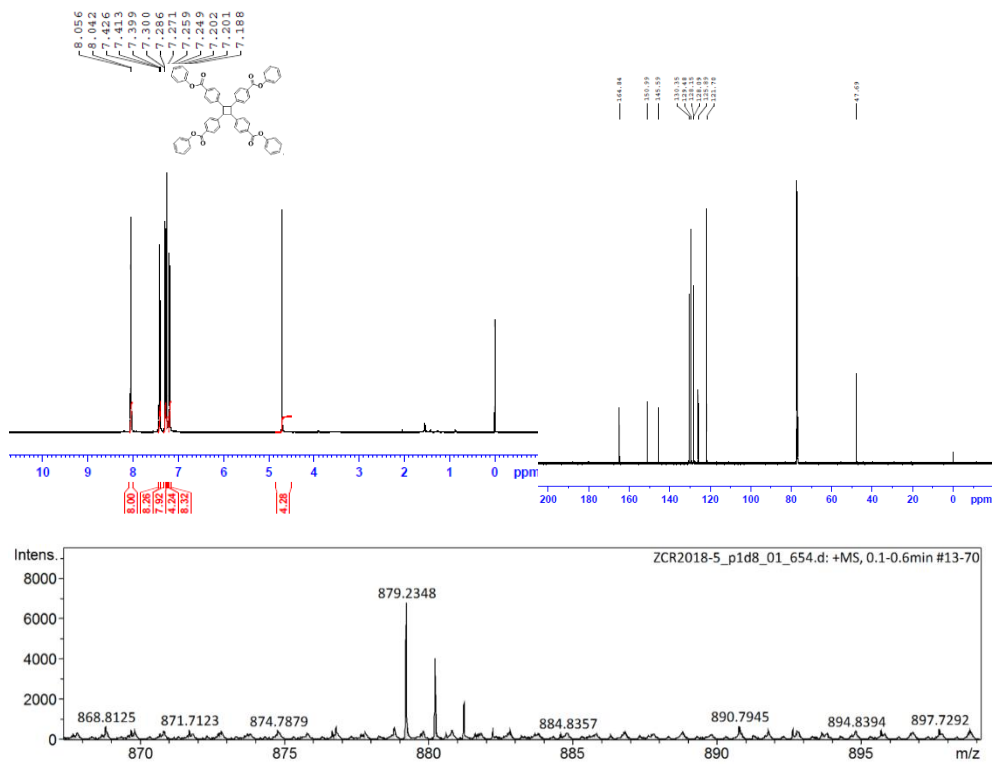

**Fig. S5**  $^1\text{H}$  NMR (top, left),  $^{13}\text{C}$  NMR (top, right), and mass spectra (bottom) of compound **e**.

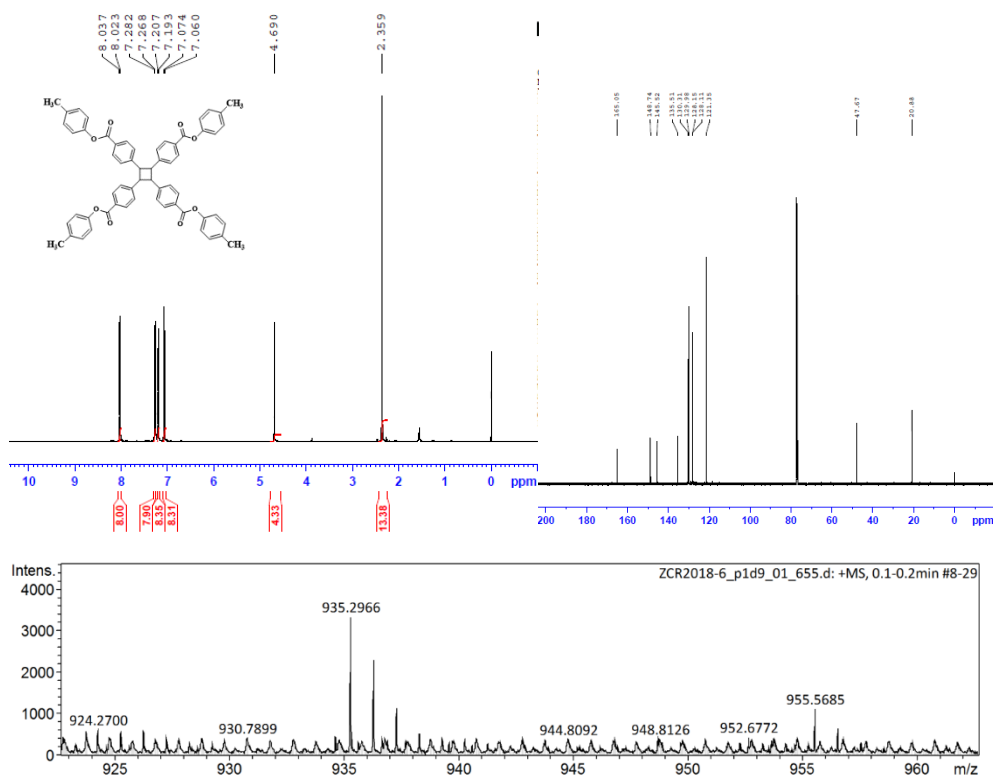

**Fig. S6**  $^1\text{H}$  NMR (top, left),  $^{13}\text{C}$  NMR (top, right), and mass spectra (bottom) of compound **f**.

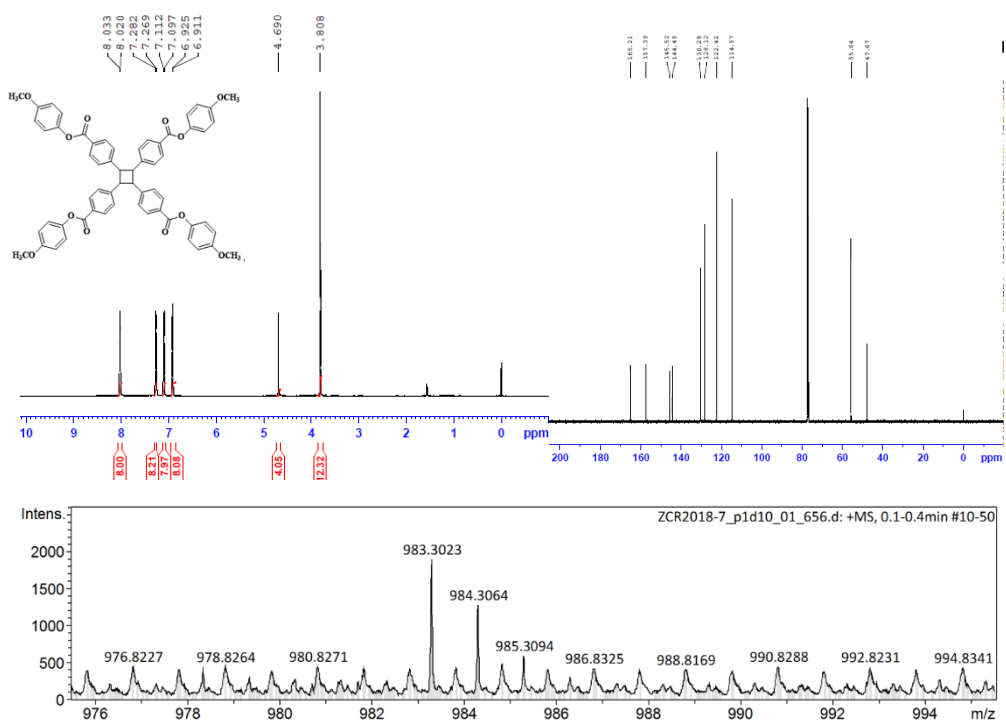

**Fig. S7**  $^1\text{H}$  NMR (top, left),  $^{13}\text{C}$  NMR (top, right), and mass spectra (bottom) of compound **g**.

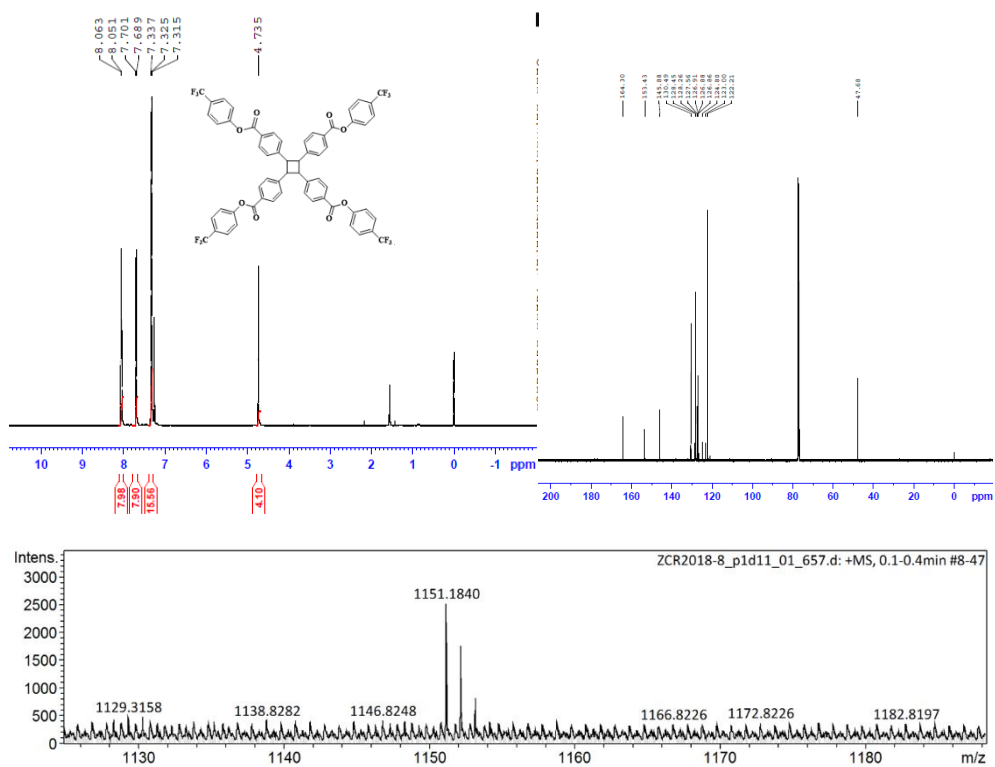

**Fig. S8**  $^1\text{H}$  NMR (top, left),  $^{13}\text{C}$  NMR (top, right), and mass spectra (bottom) of compound **h**.

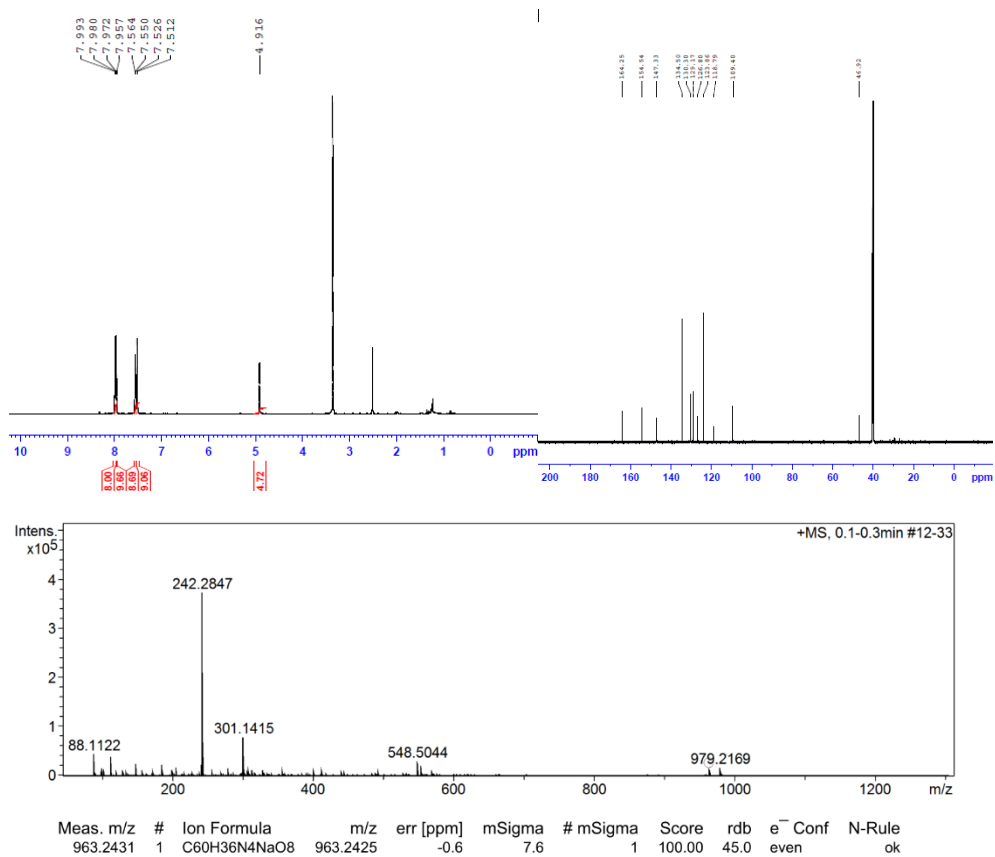

**Fig. S9**  $^1\text{H}$  NMR (top, left),  $^{13}\text{C}$  NMR (top, right), and mass spectra (bottom) of compound **i**.

### S3 ECD construction

The schematic diagram of the ECD is shown in Scheme S1. Ferrocene (Fc) was used as a counter redox material to stabilize ECD. The reactions of color change in the device are mainly as follows:

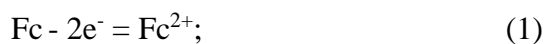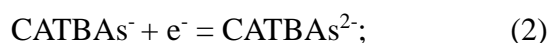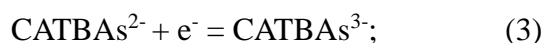

Fc loses electrons in the device to undergo an oxidation reaction, and the EC material undergoes an electron reduction reaction while also undergoing a color change. The role of Fc is to provide electrons for the reduction of EC materials to make the reaction faster, thereby accelerating the response time of the device and appropriately reducing the driving voltage.

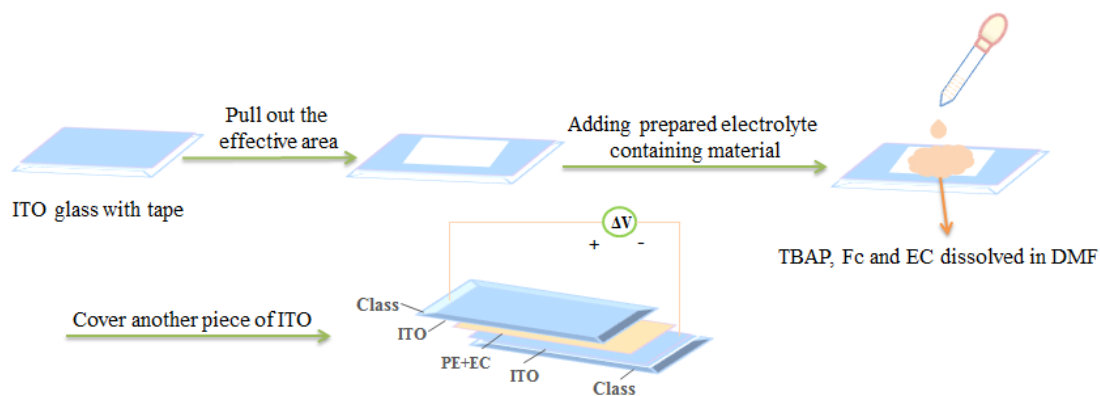

Scheme S1 ECD structure diagram

## S4 Crystal data and structure refinement

**Table S2** Crystal data and experimental parameters for compound **b**

|                                             |                                                |
|---------------------------------------------|------------------------------------------------|
| Compound                                    | <b>b</b>                                       |
| Formula                                     | C <sub>40</sub> H <sub>40</sub> O <sub>8</sub> |
| Fw                                          | 648.27                                         |
| Crystal system                              | triclinic                                      |
| Space group                                 | P-1                                            |
| a/Å                                         | 7.7762(2)                                      |
| b/Å                                         | 8.2847(4)                                      |
| c/Å                                         | 13.7706(6)                                     |
| α/°                                         | 99.715(4)                                      |
| β/°                                         | 94.914(3)                                      |
| γ/°                                         | 94.610(3)                                      |
| Volume/Å <sup>3</sup>                       | 867.14(6)                                      |
| Z                                           | 1                                              |
| ρ <sub>calc</sub> /g/cm <sup>3</sup>        | 1.242                                          |
| μ/mm <sup>-1</sup>                          | 0.698                                          |
| radiation                                   | CuKα                                           |
| size (mm)                                   | 0.20 × 0.20 × 0.20                             |
| F(000)                                      | 344.0                                          |
| 2θ range (deg)                              | 10.886 to 146.06                               |
| reflns collected                            | 9530                                           |
| indep. reflns                               | 3389 (R <sub>int</sub> = 0.0223)               |
| reflns obs. [ <i>I</i> > 2σ( <i>I</i> )]    | 3008                                           |
| data/restr/paras                            | 3389/ 37/ 239                                  |
| GOF                                         | 1.048                                          |
| R1/wR2 [ <i>I</i> ≥ 2σ( <i>I</i> )]         | 0.0580 / 0.1631                                |
| R1/wR2 (all data)                           | 0.0621 / 0.1684                                |
| largest diff. peak/hole / e Å <sup>-3</sup> | 0.20 / -0.23                                   |
| CCDC                                        | 1936928                                        |



## S5 Molecular orbital diagrams of CBTBAs

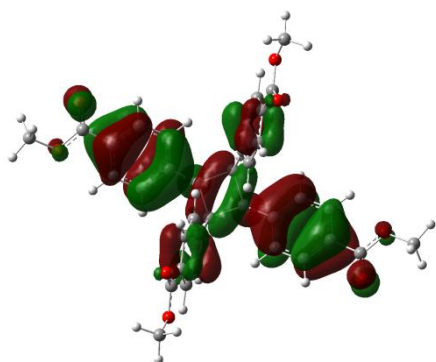

HOMO-a

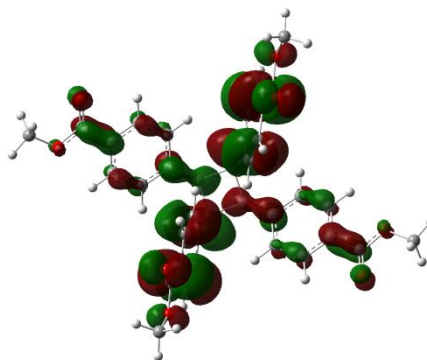

LUMO-a

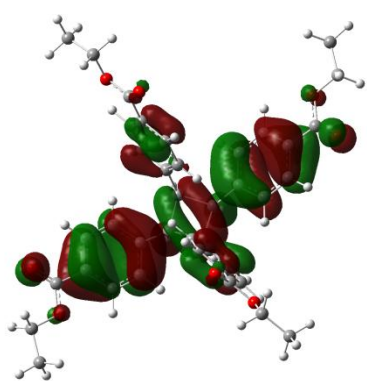

HOMO-b

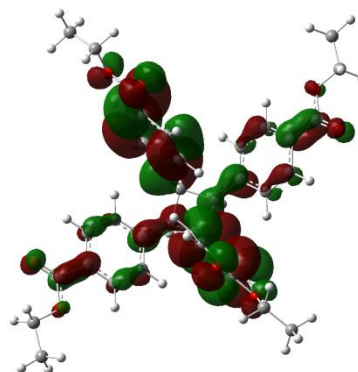

LUMO-b

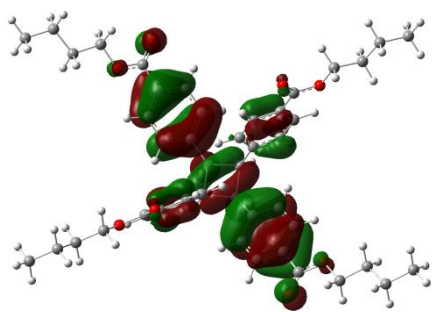

HOMO-c

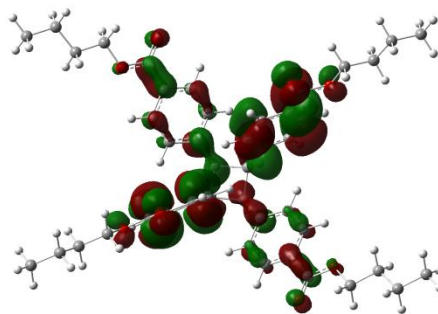

LUMO-c

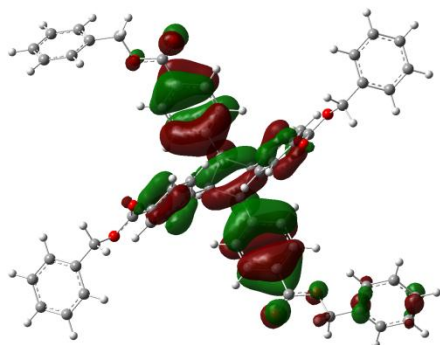

HOMO-d

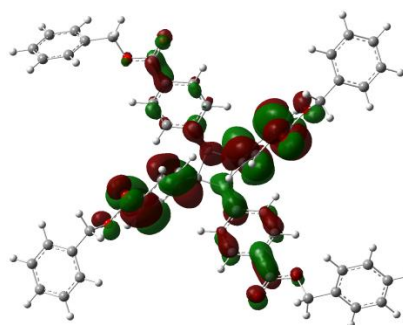

LUMO-d

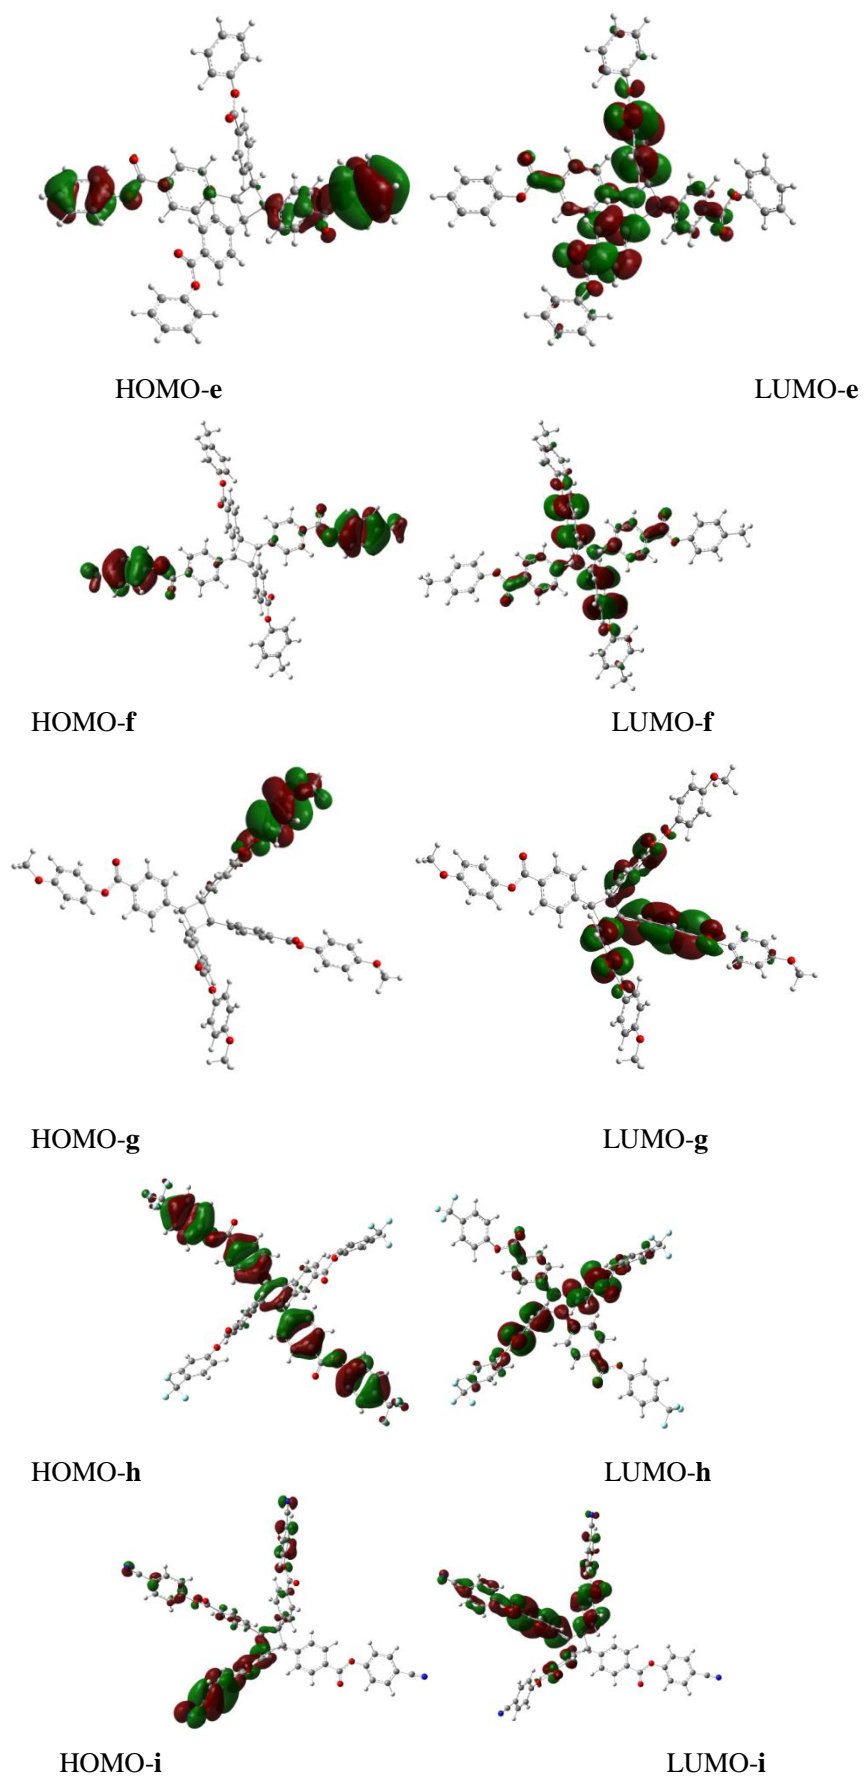

**Fig. S10** The molecular orbital diagram of CBTBAs.

## S6 Cyclic voltammograms

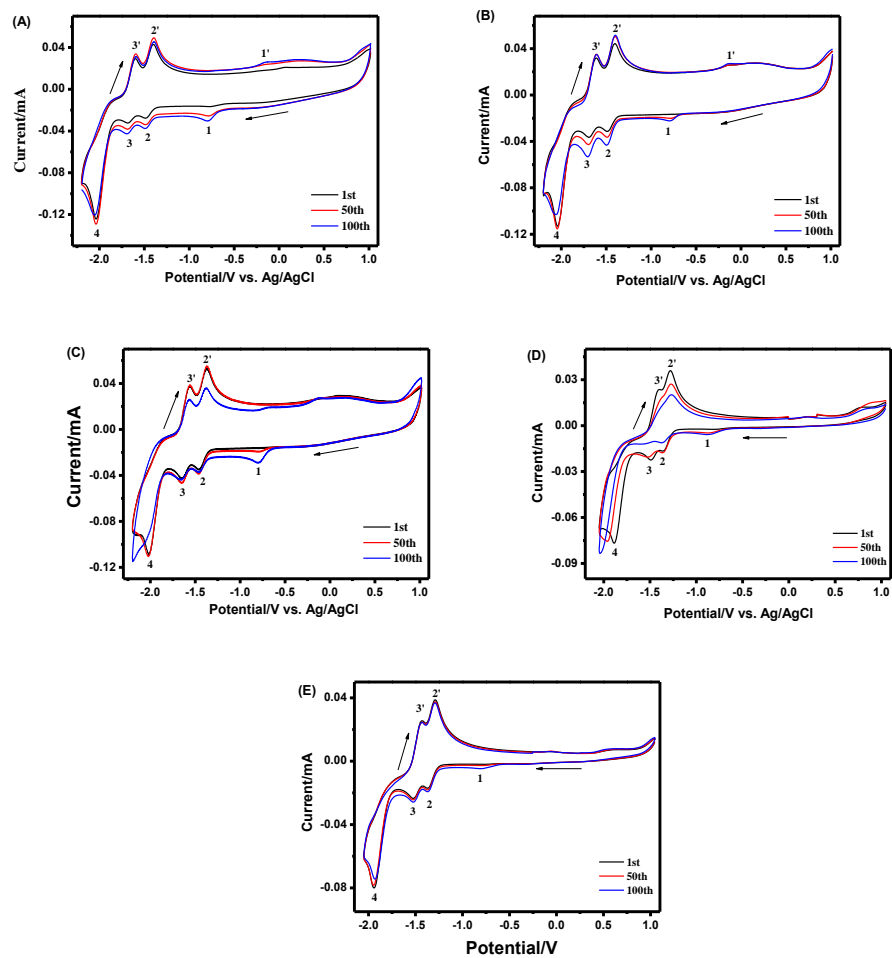

**Fig. S11** Cyclic voltammograms of 1 mmol L<sup>-1</sup> compounds **a** (A), **c** (B), **d** (C), **e** (D), and **g** (E) cycled 100 times between -2.20 and 1.05 V vs. Ag/AgCl of in 50 mmol L<sup>-1</sup> TBAPF<sub>6</sub>/DMF at 100 mV s<sup>-1</sup>.

## S7 UV-Vis Spectroscopy

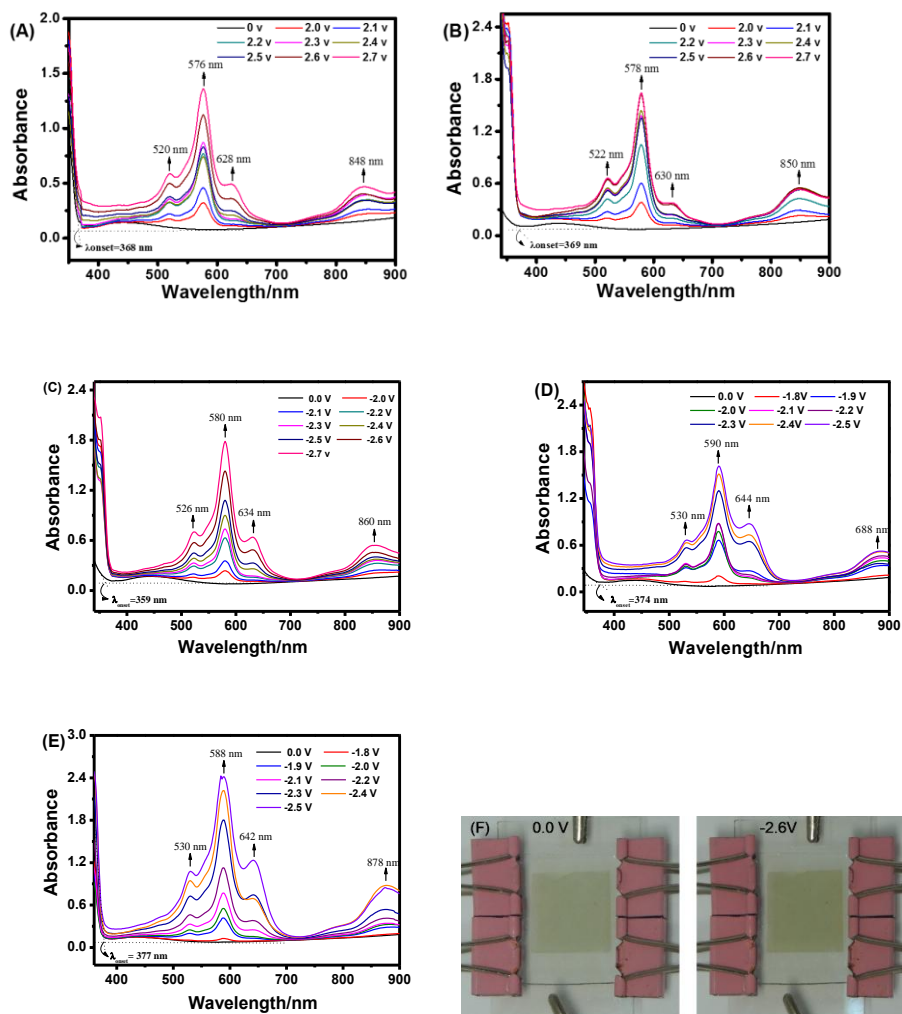

**Fig. S12** UV-vis absorption spectra for compound **a** (A), **c** (B), **d** (C), **e** (D), and **g** (E) with a concentration of  $20 \text{ mmol L}^{-1}$  on indium tin oxide-coated glass at different potentials. (F) Photograph of ECD based on compound **i** upon an applied potential of 0.0 and -2.6 V.

## S8 Transmittance change

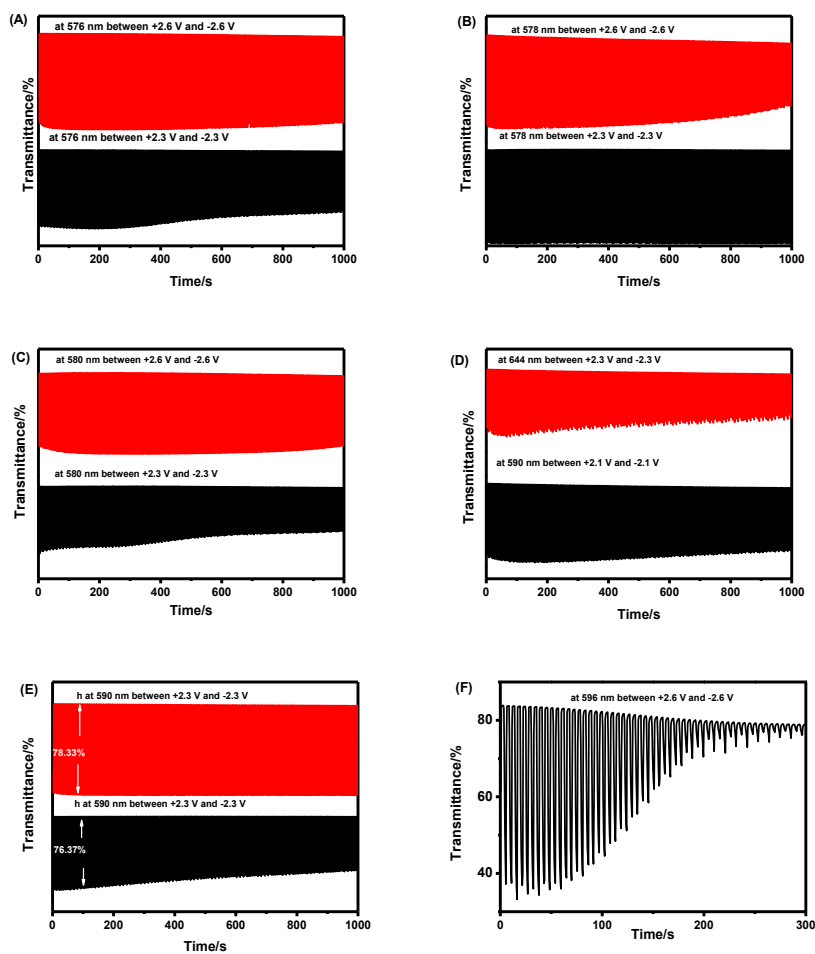

**Fig. S13** Transmittance switching stability monitored at the maximum absorption wavelength under the applied potential of  $\pm 2.3$  V and  $\pm 2.6$  for compound **b** (A), **c** (B), **d** (C), and  $\pm 2.1$  V and  $\pm 2.3$  for compound **e** (D), **g** (E), and  $\pm 2.6$  V for compound **h** (F).

## S9 Response time

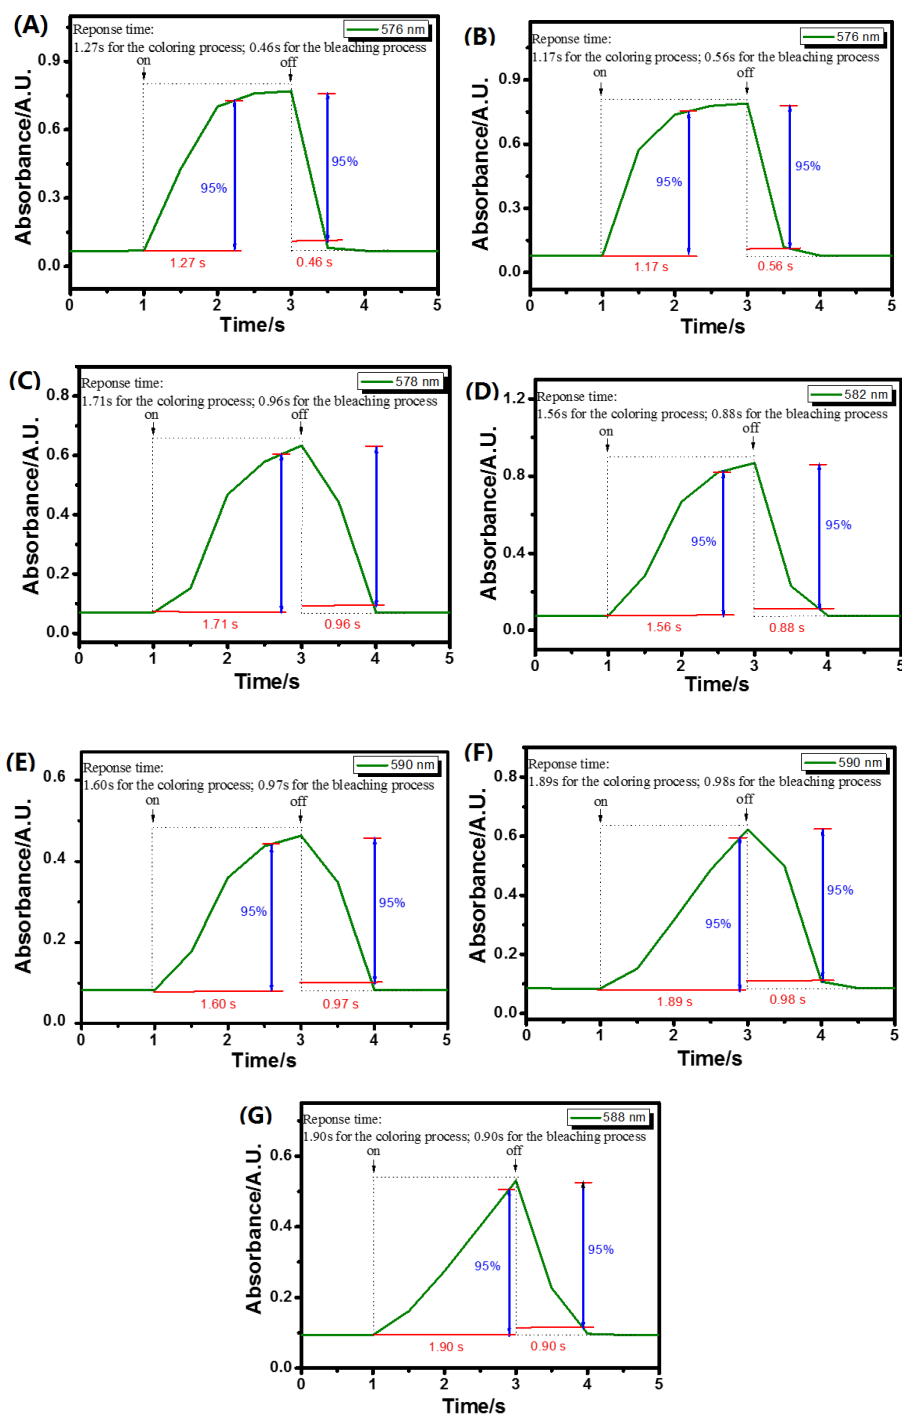

**Fig. S14** Optical switching study of ECDs based on compounds **a** (A), **b** (B), **c** (C), **d** (D), **e** (E), **f** (F), and **g** (G) monitored at the maximum absorption wavelength under the applied potential of  $\pm 2.3$  V for compound **a-d** and  $\pm 2.1$  V for compound **e-g**.

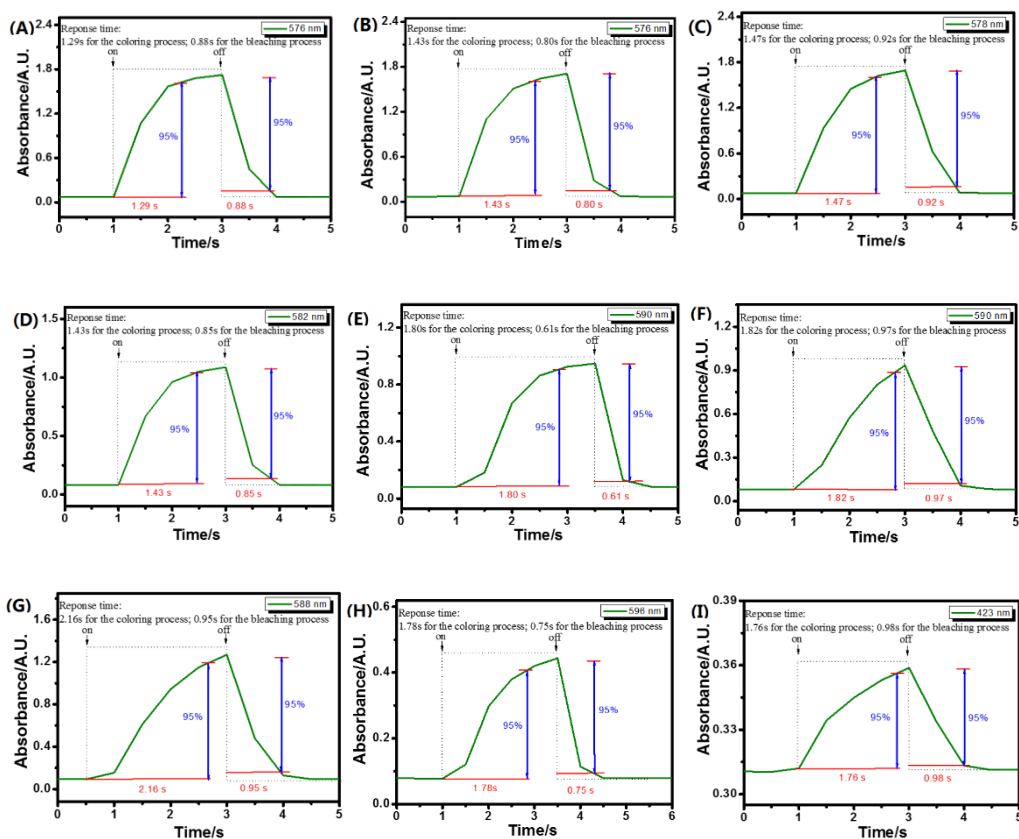

**Fig. S15** Optical switching study of ECDs based on compounds **a** (A), **b** (B), **c** (C), **d** (D), **e** (E), **f** (F), **g** (G), **h** (H), and **i** (I) monitored at the maximum absorption wavelength under the applied potential of  $\pm 2.6$  V for compound **a-d** and  $\pm 2.3$  V for compound **e-i**.

### S10 Coloration efficiency

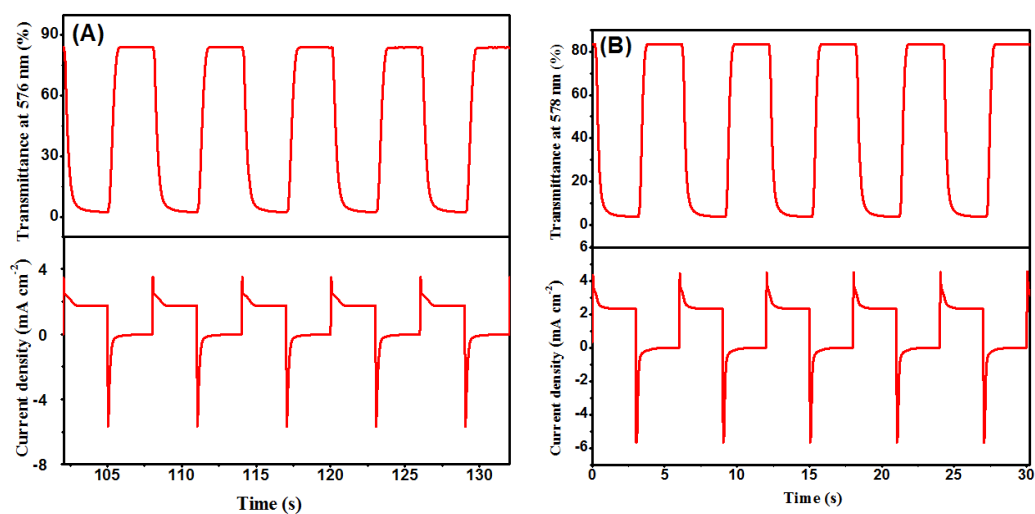

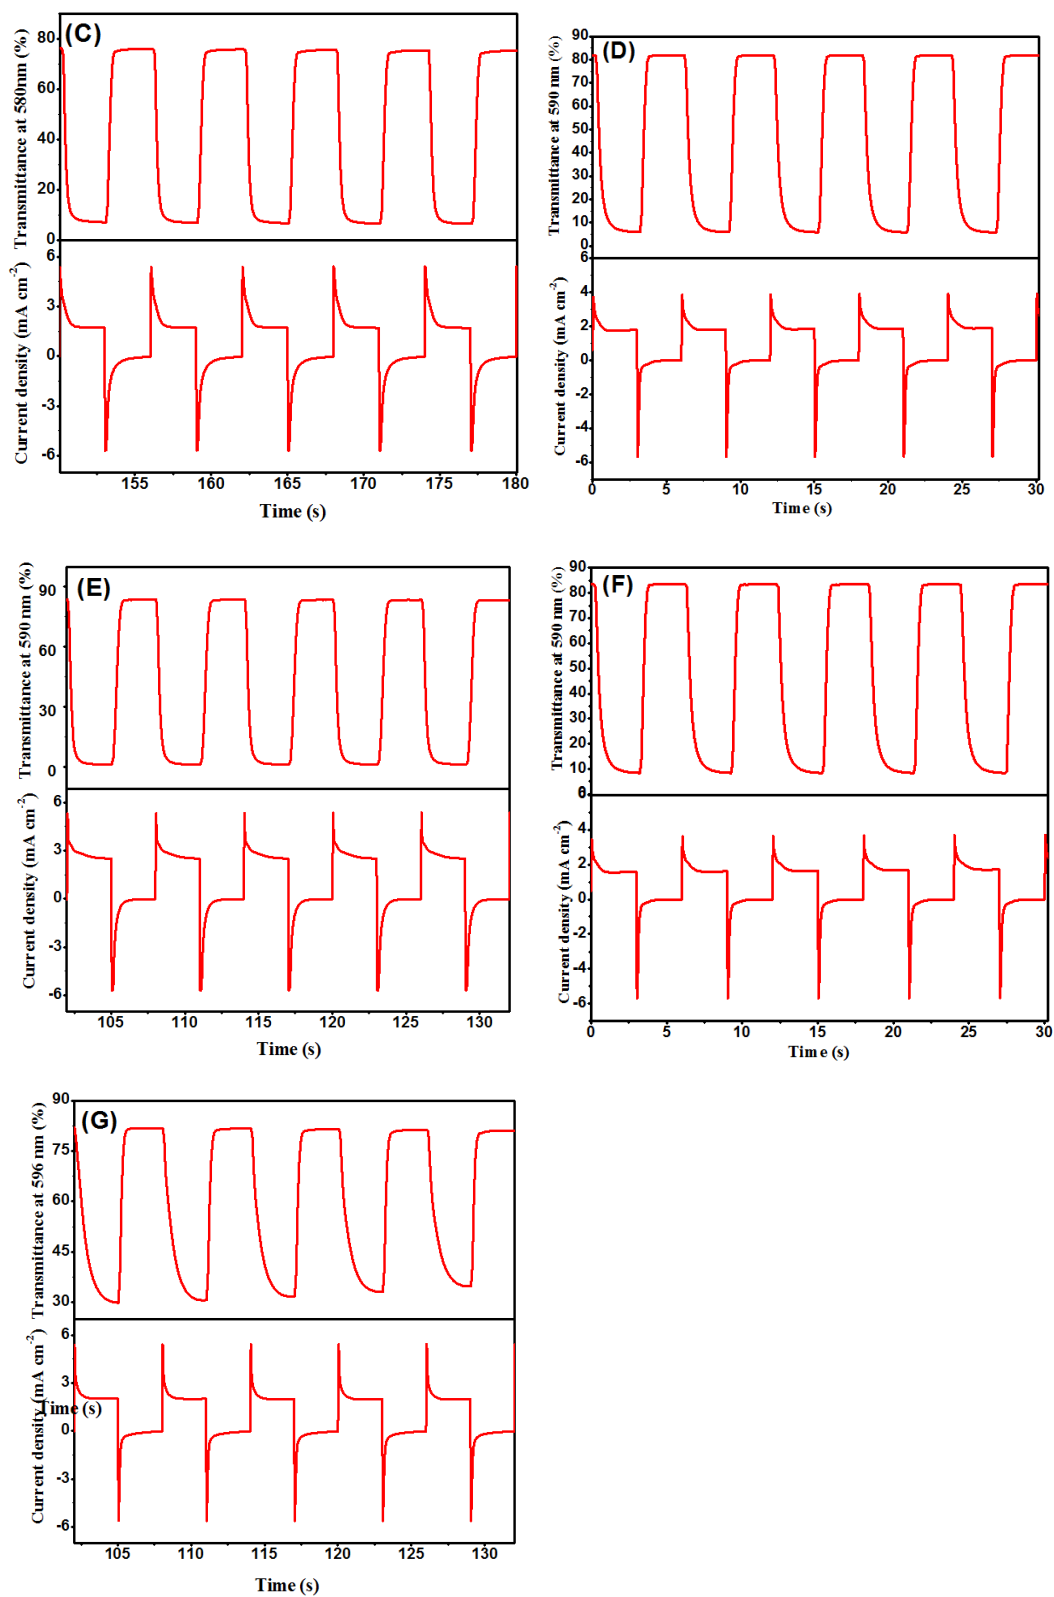

**Fig. S16** Chronoamperometry curve and the corresponding in-situ transmittance curve of the ECD based on compounds **b** (A), **c** (B), **d** (C), **e** (D), **f** (E), **g** (F), and **h** (G).



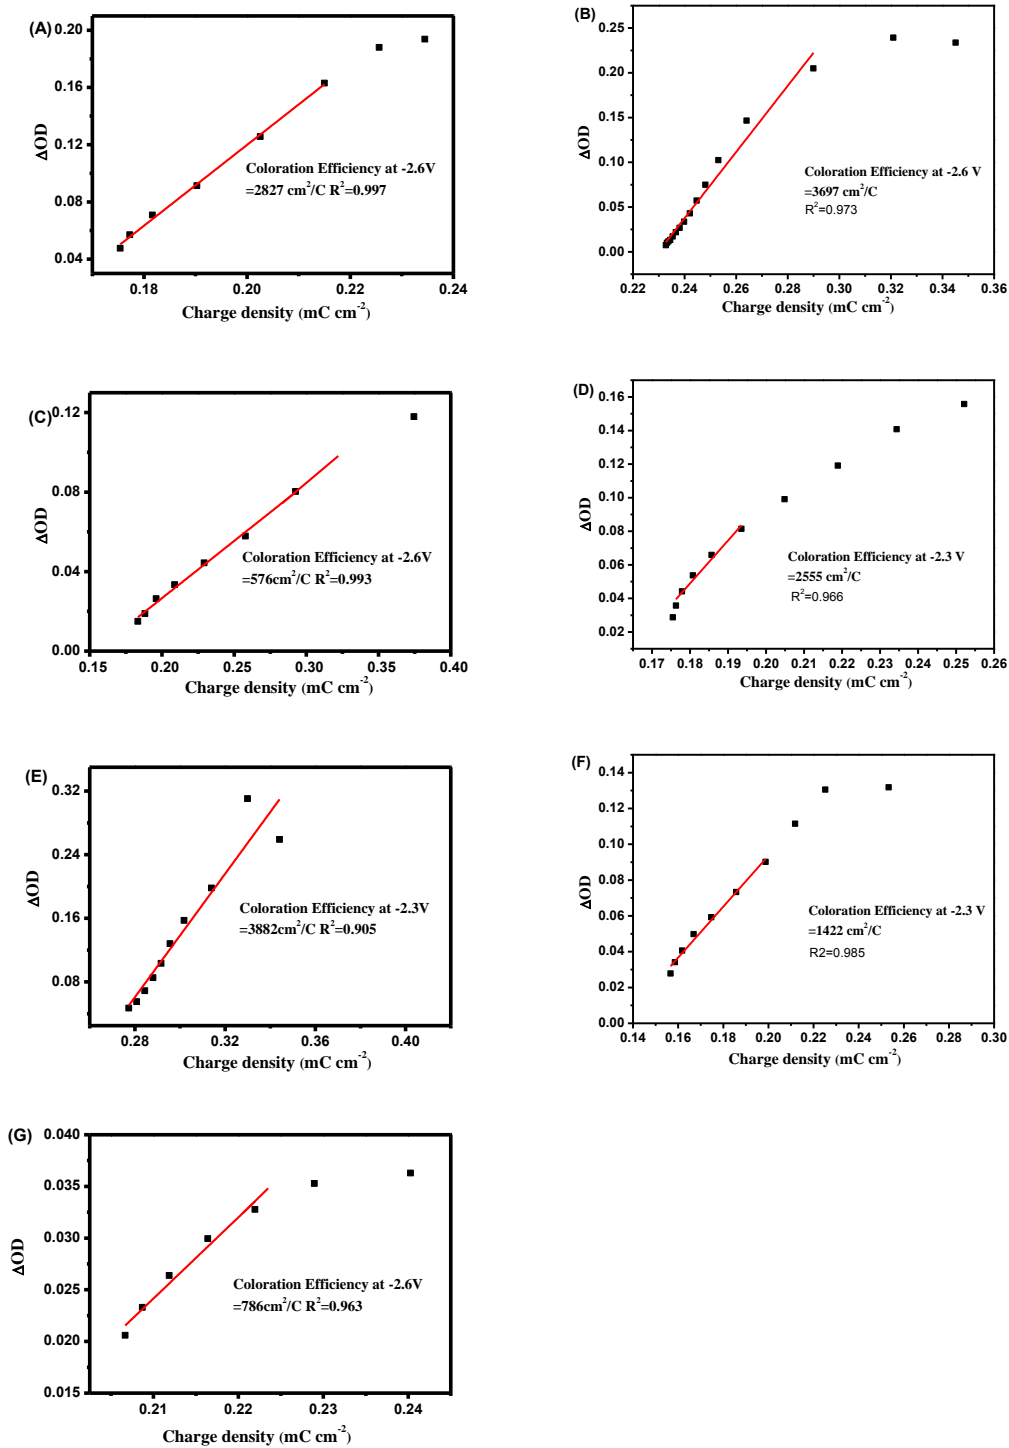

**Fig. S17** Optical density versus charge density of the ECD based on compounds **b** (A), **c** (B), **d** (C), **e** (D), **f** (E), **g** (F), and **h** (G).
